# Supplementary material
Source: Elsevier journal article supplement (https://natap.org/2017/HCV/mmc1.pdf)
Supplement: mmc1 [file mmc1.pdf]

# Supplementary Material

## High Efficacy Rates of ABT-493 and ABT-530 Treatment in Patients with HCV Genotype 1 or 3 Infection and Compensated Cirrhosis

Edward Gane, Fred Poordad, Stanley Wang, Armen Asatryan, Paul Y. Kwo, Jacob Lalezari, David L. Wyles, Tarek Hassanein, Humberto Aguilar, Benedict Maliakkal, Ran Liu, Chih-Wei Lin, Teresa I. Ng, Jens Kort, Federico J. Mensa

### Table of contents

|                                                                                                                    |   |
|--------------------------------------------------------------------------------------------------------------------|---|
| Investigators for HCV GT1 and GT3 Patients with Cirrhosis .....                                                    | 2 |
| Key SURVEYOR-I Eligibility Criteria .....                                                                          | 3 |
| Key SURVEYOR-II Eligibility Criteria .....                                                                         | 4 |
| Virologic Stopping and Futility Criteria .....                                                                     | 5 |
| Supplemental Table 1. Baseline NS3 and NS5A Substitutions Detected in Patients with HCV Genotype 1 Infection ..... | 6 |
| Supplemental Table 2. Baseline NS3 and NS5A Substitutions Detected in Patients with HCV Genotype 3 Infection ..... | 7 |
| Supplemental Table 3. Characteristics of Patients Experiencing Virologic Failure .....                             | 8 |

ABT-493 was identified by AbbVie and Enanta Pharmaceuticals.

### **Investigators for HCV GT1 and GT3 Patients with Cirrhosis**

**SURVEYOR-I:** Humberto Aguilar, Leslie Bank, Franco Felizarta, Edward Gane, Susan Greenbloom, Tarek Hassanein, Jacob Lalezari, Fred Poordad, Federico Rodriguez-Perez, Barbara Rosado-Carrion, Ruth Soto-Malave, Nigel Stace, Catherine Stedman.

**SURVEYOR-II:** Kosh Agarwal, Humberto Aguilar, Wendy Cheng, Mario Chojkier, Paul Desmond, Rolland Dickson, Gregory Dore, Franco Felizarta, Bradley Freilich, Edward Gane, Jacob George, Peter Ghali, Reem Ghalib, Sinikka Green, Susan Greenbloom, William Harlan III, Tarek Hassanein, Robert Herring Jr., Paul Kwo, Samuel Lee, Benedict Maliakkal, Andrew Muir, Frederick Nunes, Christopher O'Brien, Stephen Pianko, Fred Poordad, Peter Ruane, Joseph Sasadeusz, Stephen Shafran, David Shaw, Mitchell Shiffman, Jihad Slim, Catherine Stedman, John Vierling, Martin Weltman, David Wyles.

## Key SURVEYOR-I Eligibility Criteria

### Inclusion

- Male or female between 18 and 70 years of age, inclusive, at time of screening.
- Screening laboratory result indicating HCV GT1 infection.
- Chronic HCV infection defined as one of the following:
  - Positive for anti-HCV antibody (Ab) or HCV RNA at least 6 months before screening, and positive for HCV RNA and anti-HCV Ab at the time of screening; or
  - Positive for anti-HCV Ab and HCV RNA at the time of Screening with a liver biopsy consistent with chronic HCV infection (or a liver biopsy performed prior to enrollment with evidence of chronic HCV infection).
- Patient must meet one of the following criteria:
  - Treatment-naïve: patient has never received treatment for HCV infection.
  - Peginterferon/ribavirin experienced:
    - On-treatment failure: patient received PR for the treatment of HCV, did not discontinue due to intolerance or an adverse event, and failed to achieve an undetectable HCV RNA at the end of PR treatment; or
    - Relapse: patient received anti-HCV therapy with PR, did not discontinue due to intolerance or an adverse event, and had detectable HCV RNA during treatment follow-up.
  - Note: previous HCV treatment must have been completed  $\geq 2$  months prior to screening.
- Body Mass Index (BMI) is from  $\geq 18$  to  $< 38 \text{ kg/m}^2$  at the time of screening. BMI is calculated as weight measured in kilograms (kg) divided by the square of height measured in meters (m).
- Patients must have been documented as having cirrhosis defined as meeting one of the following criteria (per local standard):
  - A liver biopsy within 24 months prior to or during screening demonstrating the presence of cirrhosis, eg, a METAVIR Score of  $> 3$  (including 3/4 or 3 – 4), Ishak score of  $> 4$ ; or
  - FibroScan score  $\geq 14.6 \text{ kPa}$  within 6 months of screening or during screening, or
    - Patients with indeterminate FibroScan score ( $12.5 - < 14.6$ ) must have qualifying liver biopsy.
  - A screening FibroTest result that is  $\geq 0.75$  and an APRI  $> 2$ 
    - Patients with conflicting FibroTest and APRI results must have a qualifying FibroScan or liver biopsy.
- HCV RNA  $> 10,000 \text{ IU/mL}$  at screening.

### Exclusion

- Absence of a positive test result at screening for hepatitis B surface antigen (HBsAg) and anti-human immunodeficiency virus antibody (HIV Ab).
- HCV genotype performed during screening indicating co-infection with more than one HCV genotype.
- Screening laboratory analyses showing any of the following abnormal laboratory results:
  - ALT  $> 5 \times \text{ULN}$ .

- AST >5 × ULN.
- Calculated creatinine clearance of <50 mL/min.
- Albumin <LLN.
- International normalized ratio (INR) >1.5.
- Hemoglobin <LLN.
- Platelets <90,000 cells per mm<sup>3</sup>.
- Absolute neutrophil count (ANC) <1500 cells/μL (<1200 cells/μL for patients of black race or patients of African descent who are black).
- Indirect bilirubin ≥1.5 × ULN.
- Direct bilirubin >ULN.
- History of solid organ transplant.
- Previous use of any HCV direct-acting antiviral.

## **Key SURVEYOR-II Eligibility Criteria**

### **Inclusion**

- Male or female between 18 and 70 years of age, inclusive, at time of screening.
- Screening laboratory result indicating HCV GT3 infection.
- Chronic HCV infection defined as one of the following:
  - Positive for anti-HCV Ab or HCV RNA at least 6 months before screening, and positive for HCV RNA and anti-HCV Ab at the time of screening; or
  - Positive for anti-HCV Ab and HCV RNA at the time of screening with a liver biopsy consistent with chronic HCV infection (or a liver biopsy performed prior to enrollment with evidence of chronic HCV infection).
- Patient must meet one of the following criteria:
  - Treatment-naïve: patient has never received treatment for HCV infection.
  - Treatment-experienced (selected-dose arms):
    - PegIFN/RBV on-treatment failure: patient received pegIFN/RBV for the treatment of HCV, did not discontinue because of intolerance or an adverse event of the treatment, and failed to achieve an undetectable HCV RNA level at the end of treatment; or
    - PegIFN/RBV post-treatment relapse: patient received pegIFN/RBV for the treatment of HCV, did not discontinue because of intolerance or an adverse event of the treatment, and had undetectable HCV RNA at the end of treatment but detectable HCV RNA during treatment follow-up.
    - Note: previous HCV treatment must have been completed ≥2 months prior to screening.
- Body Mass Index (BMI) is from ≥18 to <38 kg/m<sup>2</sup> at the time of screening. BMI is calculated as weight measured in kilograms (kg) divided by the square of height measured in meters (m).
- Patients must have been documented as having cirrhosis defined as meeting one of the following criteria (per local standard):

- A liver biopsy prior to or during screening demonstrating the presence of cirrhosis, eg, a METAVIR Score of >3 (including 3/4 or 3 – 4), Ishak score of >4; or
- FibroScan score  $\geq 14.6$  kPa within 6 months of screening or during screening, or
  - Patients with indeterminate FibroScan score (12.5 – <14.6) must have qualifying liver biopsy.
- A screening FibroTest result that is  $\geq 0.75$  and an APRI >2
  - Patients with conflicting FibroTest and APRI results must have a qualifying FibroScan or liver biopsy.
- HCV RNA >10,000 IU/mL at screening.

### Exclusion

- Absence of a positive test result at screening for hepatitis B surface antigen (HBsAg) and anti-human immunodeficiency virus antibody (HIV Ab).
- HCV genotype performed during screening indicating co-infection with more than one HCV genotype.
- Screening laboratory analyses showing any of the following abnormal laboratory results:
  - ALT >5  $\times$  ULN.
  - AST >5  $\times$  ULN.
  - Calculated creatinine clearance of <50 mL/min.
  - Albumin <LLN.
  - INR >1.5.
  - Hemoglobin <LLN.
  - Platelets <90,000 cells per  $\text{mm}^3$ .
  - ANC <1500 cells/ $\mu\text{L}$  (<1200 cells/ $\mu\text{L}$  for patients of black race or patients of African descent who are black).
  - Direct bilirubin >ULN.
- History of solid organ transplant.
- Previous use of any HCV direct-acting antiviral.

### Virologic Stopping and Futility Criteria

Patients were required to stop treatment with study drugs if they met any of the following criteria:

- Confirmed increase from nadir in HCV RNA, defined as 2 consecutive HCV RNA measurements ( $>1 \log_{10}$  IU/mL above nadir) at any time point during treatment.
- Failure to achieve unquantifiable HCV RNA levels by week 6.
- Confirmed quantifiable HCV RNA level at any point after an unquantifiable level.

**Supplemental Table 1. Baseline NS3 and NS5A Substitutions Detected in Patients with HCV Genotype 1 Infection**

|                                                                                                                                                                                                                                                                                                                                                                                                                                                                                                                                                                                                                                                                                                                                                                                                                                                                                                                                                                                                                                                                                                                             | Genotype 1<br>ABT-493 200 mg<br>ABT-530 120 mg<br>N = 27 |
|-----------------------------------------------------------------------------------------------------------------------------------------------------------------------------------------------------------------------------------------------------------------------------------------------------------------------------------------------------------------------------------------------------------------------------------------------------------------------------------------------------------------------------------------------------------------------------------------------------------------------------------------------------------------------------------------------------------------------------------------------------------------------------------------------------------------------------------------------------------------------------------------------------------------------------------------------------------------------------------------------------------------------------------------------------------------------------------------------------------------------------|----------------------------------------------------------|
| <b>NS3 substitutions, n (%)</b>                                                                                                                                                                                                                                                                                                                                                                                                                                                                                                                                                                                                                                                                                                                                                                                                                                                                                                                                                                                                                                                                                             |                                                          |
| V55A                                                                                                                                                                                                                                                                                                                                                                                                                                                                                                                                                                                                                                                                                                                                                                                                                                                                                                                                                                                                                                                                                                                        | 2 (7)                                                    |
| Q80K                                                                                                                                                                                                                                                                                                                                                                                                                                                                                                                                                                                                                                                                                                                                                                                                                                                                                                                                                                                                                                                                                                                        | 4 (15)                                                   |
| S122G                                                                                                                                                                                                                                                                                                                                                                                                                                                                                                                                                                                                                                                                                                                                                                                                                                                                                                                                                                                                                                                                                                                       | 2 (7)                                                    |
| I170V                                                                                                                                                                                                                                                                                                                                                                                                                                                                                                                                                                                                                                                                                                                                                                                                                                                                                                                                                                                                                                                                                                                       | 4 (15)                                                   |
| <b>NS5A substitutions, n (%)</b>                                                                                                                                                                                                                                                                                                                                                                                                                                                                                                                                                                                                                                                                                                                                                                                                                                                                                                                                                                                                                                                                                            |                                                          |
| M28V                                                                                                                                                                                                                                                                                                                                                                                                                                                                                                                                                                                                                                                                                                                                                                                                                                                                                                                                                                                                                                                                                                                        | 2 (7)                                                    |
| Q30R                                                                                                                                                                                                                                                                                                                                                                                                                                                                                                                                                                                                                                                                                                                                                                                                                                                                                                                                                                                                                                                                                                                        | 1 (4)                                                    |
| R30Q (GT1b)*                                                                                                                                                                                                                                                                                                                                                                                                                                                                                                                                                                                                                                                                                                                                                                                                                                                                                                                                                                                                                                                                                                                | 1 (4)                                                    |
| L31M                                                                                                                                                                                                                                                                                                                                                                                                                                                                                                                                                                                                                                                                                                                                                                                                                                                                                                                                                                                                                                                                                                                        | 1 (4)                                                    |
| <p>GT, genotype.<br/>           * Only 1 GT1b-infected patient had a baseline HCV sequence substitution; all other substitutions were found in GT1a-infected patients.<br/>           Baseline substitutions were detected by population sequencing (threshold for detection ~15%). NS3 protease or NS5A inhibitor baseline resistance-associated substitutions for HCV GT1 are more clearly defined than other genotypes and were assessed based on the specific amino acid substitutions at the signature positions described below.<br/> <b>GT1 NS3 substitutions:</b><br/>           GT1a: V36A/G/I/L/M, F43L, T54A/S, V55A/I, Y56H, Q80K/R, V107I, S122G/R, I132V, R155(all), A156(all), V158I, D168(all), and I170F/T/V.<br/>           GT1b: V36A/G/I/L/M, T54A/C/G/S, V55A, Y56H/L, Q80K/R, V107I, S122A/D/G/I/N/T, R155(all), A156(all), V158I, D168(all), V170A/T, and M175L.<br/> <b>GT1 NS5A substitutions:</b><br/>           GT1a: M28(all), Q30(all), L31(all), P32L, H58D/R, and Y93(all).<br/>           GT1b: L28(all), P29S/del, R30G/H/P/Q, L31(all), P32L/del, P58A/S, Q62D, A92E/K, and Y93(all).</p> |                                                          |

**Supplemental Table 2. Baseline NS3 and NS5A Substitutions Detected in Patients with HCV Genotype 3 Infection**

|                                                                                                                                                                                                                                                                                                                                                                                                                                                                                                                                                                                                                                                                                                                                                                                                        | <b>Genotype 3<br/>ABT-493 300 mg<br/>ABT-530 120 mg<br/><br/>N = 28</b> | <b>Genotype 3<br/>ABT-493 300 mg<br/>ABT-530 120 mg<br/>RBV 800 mg<br/><br/>N = 27</b> |
|--------------------------------------------------------------------------------------------------------------------------------------------------------------------------------------------------------------------------------------------------------------------------------------------------------------------------------------------------------------------------------------------------------------------------------------------------------------------------------------------------------------------------------------------------------------------------------------------------------------------------------------------------------------------------------------------------------------------------------------------------------------------------------------------------------|-------------------------------------------------------------------------|----------------------------------------------------------------------------------------|
| <b>NS3 substitutions, n (%)</b>                                                                                                                                                                                                                                                                                                                                                                                                                                                                                                                                                                                                                                                                                                                                                                        |                                                                         |                                                                                        |
| Y56F                                                                                                                                                                                                                                                                                                                                                                                                                                                                                                                                                                                                                                                                                                                                                                                                   | 1 (4)                                                                   | 0                                                                                      |
| Q80K                                                                                                                                                                                                                                                                                                                                                                                                                                                                                                                                                                                                                                                                                                                                                                                                   | 1 (4)                                                                   | 0                                                                                      |
| A166S/T                                                                                                                                                                                                                                                                                                                                                                                                                                                                                                                                                                                                                                                                                                                                                                                                | 6 (21)                                                                  | 4 (15)                                                                                 |
| Q168K                                                                                                                                                                                                                                                                                                                                                                                                                                                                                                                                                                                                                                                                                                                                                                                                  | 1 (4)                                                                   | 0                                                                                      |
| <b>NS5A substitutions, n (%)</b>                                                                                                                                                                                                                                                                                                                                                                                                                                                                                                                                                                                                                                                                                                                                                                       |                                                                         |                                                                                        |
| A30K/T (GT3a)                                                                                                                                                                                                                                                                                                                                                                                                                                                                                                                                                                                                                                                                                                                                                                                          | 2 (7)                                                                   | 3 (11)                                                                                 |
| K30M (GT3b)*                                                                                                                                                                                                                                                                                                                                                                                                                                                                                                                                                                                                                                                                                                                                                                                           | 1 (4)                                                                   | NA                                                                                     |
| L31M (GT3a)                                                                                                                                                                                                                                                                                                                                                                                                                                                                                                                                                                                                                                                                                                                                                                                            | 0                                                                       | 1 (4)                                                                                  |
| V31M (GT3b)*                                                                                                                                                                                                                                                                                                                                                                                                                                                                                                                                                                                                                                                                                                                                                                                           | 1 (4)                                                                   | NA                                                                                     |
| P58S                                                                                                                                                                                                                                                                                                                                                                                                                                                                                                                                                                                                                                                                                                                                                                                                   | 1 (4)                                                                   | 1 (4)                                                                                  |
| Y93H                                                                                                                                                                                                                                                                                                                                                                                                                                                                                                                                                                                                                                                                                                                                                                                                   | 1 (4)                                                                   | 3 (11)                                                                                 |
| <p>GT, genotype; NA, not applicable because no GT3b-infected patients were enrolled in this arm.</p> <p>* Only 1 GT3b-infected patient was enrolled and had 2 baseline NS5A substitutions; all other amino acid substitutions were found in GT3a-infected patients.</p> <p>Baseline substitutions were detected by population sequencing (threshold for detection ~15%) for all GT3 patients except the one GT3b-infected patient, which were detected by next generation sequencing using a detection threshold of 15%. Less is known about GT3 baseline resistance-associated substitutions, thus any amino acid substitutions at the signature positions as described below were included:</p> <p>NS3: 36, 56, 80, 155, 156, 166, and 168.</p> <p>NS5A: 24, 28, 29, 30, 31, 32, 58, 92, and 93.</p> |                                                                         |                                                                                        |

**Supplemental Table 3. Characteristics of Patients Experiencing Virologic Failure**

| PtID | Sex | Age | BL HCV RNA,<br>log <sub>10</sub> IU/mL | GT | BMI  | Platelet<br>Count,<br>×10 <sup>9</sup> | Albumin,<br>g/dL | Fibroscan<br>Result,<br>kPa | Prior PR<br>Treatment<br>Experience | Reason<br>for<br>non-SVR | Amino Acid Substitutions* |            |          |              |
|------|-----|-----|----------------------------------------|----|------|----------------------------------------|------------------|-----------------------------|-------------------------------------|--------------------------|---------------------------|------------|----------|--------------|
|      |     |     |                                        |    |      |                                        |                  |                             |                                     |                          | NS3                       |            | NS5A     |              |
|      |     |     |                                        |    |      |                                        |                  |                             |                                     |                          | Baseline                  | At failure | Baseline | At failure   |
| 1    | F   | 60  | 6.2                                    | 1a | 29.6 | 98                                     | 3.6              | 20.9                        | Naïve                               | Relapse                  | I170V                     | I170V      | L31M     | L31M<br>Y93N |
| 2    | M   | 59  | 7.1                                    | 3a | 26.9 | 192                                    | 4.4              | 25.7                        | Relapse                             | Relapse                  | A166S                     | None       | None     | M28G         |

PtID, patient ID; GT, genotype; BMI, body mass index measured as kg/m<sup>2</sup>; PR, peginterferon/RBV.  
 \* Amino acid substitution(s) as determined by population sequencing with a detection threshold of approximately 15%.
